# Supplementary material for: Ambulances under siege in Syria
Source: PubMed Central journal article supplement — BMJ Glob Health. 2018 Nov 27;3(6):e001003. doi: 10.1136/bmjgh-2018-001003 (PMC6267316; doi:10.1136/bmjgh-2018-001003), 2018-11-27
Supplement: bmjgh-2018-001003supp001.pdf [file bmjgh-2018-001003supp001.pdf]

Supplementary Material 1. Inclusion and Exclusion Criteria

|           | <b>Inclusion</b>                                                                                                                                                                                                                                                                                                                                       | <b>Exclusion</b>                                                                                                                                                                                                                                                                                                                  |
|-----------|--------------------------------------------------------------------------------------------------------------------------------------------------------------------------------------------------------------------------------------------------------------------------------------------------------------------------------------------------------|-----------------------------------------------------------------------------------------------------------------------------------------------------------------------------------------------------------------------------------------------------------------------------------------------------------------------------------|
| Abstract  | <ul style="list-style-type: none"> <li>• Refers to information about Syria</li> <li>• Is a research article, report or commentary from a peer reviewed publication</li> <li>• Contains information on attacks against health care</li> <li>• Published after January 1, 2011</li> <li>• Published in English</li> <li>• Full text available</li> </ul> | <ul style="list-style-type: none"> <li>• Does not include information about Syria or pertains mainly to events that occur outside of Syria (e.g. with Syrian refugees)</li> <li>• Is not a research article, report, or commentary from peer reviewed publications (e.g. books, dissertations, conference proceedings)</li> </ul> |
| Full Text | <ul style="list-style-type: none"> <li>• Contains information on direct or indirect impact of conflict on ambulances</li> </ul>                                                                                                                                                                                                                        | <ul style="list-style-type: none"> <li>• Pertains to information (or data) that was collected prior to 2011</li> </ul>                                                                                                                                                                                                            |
