# Supplementary material for: Ambulances under siege in Syria
Source: PubMed Central journal article supplement — BMJ Glob Health. 2018 Nov 27;3(6):e001003. doi: 10.1136/bmjgh-2018-001003 (PMC6267316; doi:10.1136/bmjgh-2018-001003), 2018-11-27
Supplement: bmjgh-2018-001003supp002.pdf [file bmjgh-2018-001003supp002.pdf]

Supplementary Material 2. Search strategy in PubMed

Filters: Full text, from 2011/01/01 to present, English language

| # | Search terms                                                                                                                                                                                                                                       | Results |
|---|----------------------------------------------------------------------------------------------------------------------------------------------------------------------------------------------------------------------------------------------------|---------|
| 1 | syria*[tiab] OR "Syria"[Mesh]                                                                                                                                                                                                                      | 2,472   |
| 2 | ("Ambulances"[Mesh]) OR ambulanc*[tiab] OR "pre-hospital care"[tiab] OR pre-hospital*[tiab] OR medical transport*[tiab] OR emergency unit*[tiab] OR ("Emergency Medical Services"[Mesh]) OR emergency medical service*[tiab] OR mobile unit*[tiab] | 41,194  |
| 3 | ("Health Care Sector"[Mesh] OR "Delivery of Health Care, Integrated"[Mesh] OR "Delivery of Health Care"[Mesh]) OR "health care"[tiab] OR "health-care"[tiab] OR "health services"[tiab] OR "medical care"[tiab] OR healthcare[tiab]                | 413,860 |
| 4 | "Health Personnel"[Mesh] OR health worker*[tiab] OR healthcare worker*[tiab] OR health person*[tiab] OR medical provider*[tiab] OR paramedic*[tiab] OR "Emergency Medical Technicians"[Mesh] OR ambulance driver*[tiab]                            | 108,834 |
| 5 | 2 OR 3 OR 4                                                                                                                                                                                                                                        | 492,314 |
| 6 | "Violence"[Mesh] OR "Warfare"[Mesh] OR "Terrorism"[Mesh] OR "Armed Conflicts"[Mesh] OR violen*[tiab] OR warfare[tiab] OR war[tiab] OR terror*[tiab] OR conflict*[tiab] OR attack*[tiab] OR combat*[tiab] OR fight*[tiab] OR hostile*[tiab]         | 146,978 |
| 7 | "Weapons"[Mesh] OR weapon*[tiab] OR bomb*[tiab] OR shoot*[tiab] OR shell*[tiab] OR missile*[tiab]                                                                                                                                                  | 56,176  |
| 8 | 6 OR 7                                                                                                                                                                                                                                             | 199,580 |
| 9 | 1 AND 5 AND 8                                                                                                                                                                                                                                      | 205     |
