# Supplementary material for: Ambulances under siege in Syria
Source: PubMed Central journal article supplement — BMJ Glob Health. 2018 Nov 27;3(6):e001003. doi: 10.1136/bmjgh-2018-001003 (PMC6267316; doi:10.1136/bmjgh-2018-001003), 2018-11-27
Supplement: bmjgh-2018-001003supp003.pdf [file bmjgh-2018-001003supp003.pdf]

### Supplementary Material 3. Full Text Articles Included in Review

| #  | Year | First Author   | Title                                                                                                                                                | Journal                                          | Themes <sup>1</sup> |
|----|------|----------------|------------------------------------------------------------------------------------------------------------------------------------------------------|--------------------------------------------------|---------------------|
| 1  | 2018 | RJ Haar        | Determining the scope of attacks on health in four governorates of Syria in 2016: Results of a field surveillance program                            | PLOS Medicine                                    | 1                   |
| 2  | 2018 | SJ Phillips    | The Ongoing Syrian Arab Republic Health Care Crisis                                                                                                  | Disaster Medicine and Public Health Preparedness | 1                   |
| 3  | 2017 | FM Fouad       | Health workers and the weaponisation of health care in Syria: a preliminary inquiry for The Lancet-American University of Beirut Commission on Syria | The Lancet                                       | 1, 2                |
| 4  | 2017 | M Elamein      | Attacks against health care in Syria, 2015–16: results from a real-time reporting tool                                                               | The Lancet                                       | 1                   |
| 5  | 2017 | P Patel        | Documenting attacks on health workers and facilities in armed conflicts                                                                              | Bulletin of the World Health Organization        | 1                   |
| 6  | 2016 | J Zarocostas   | Syrian crisis: aid delivery becoming increasingly difficult                                                                                          | The Lancet                                       | 1                   |
| 7  | 2015 | S Cousins      | Syrian crisis: health experts say more can be done                                                                                                   | The Lancet                                       | 1, 5                |
| 8  | 2015 | ZB Taleb       | Syria: health in a country undergoing tragic transition                                                                                              | International Journal of Public Health           | 1, 3, 5             |
| 9  | 2014 | O Dewachi      | Changing therapeutic geographies of the Iraqi and Syrian wars                                                                                        | The Lancet                                       | 1, 4                |
| 10 | 2014 | Author unknown | The war on Syrian civilians                                                                                                                          | The Lancet                                       | 1, 3                |
| 11 | 2014 | SL Sharara     | War and Infectious Diseases: Challenges of the Syrian Civil War                                                                                      | PLOS Pathogens                                   | 1, 3                |
| 12 | 2013 | P Shetty       | Protecting health-care workers in the firing line                                                                                                    | The Lancet                                       | 1, 4                |
| 13 | 2013 | GH Brundtland  | Open letter: let us treat patients in Syria                                                                                                          | The Lancet                                       | 1                   |
| 14 | 2013 | A Coutts       | The emerging Syrian health crisis                                                                                                                    | The Lancet                                       | 3                   |
| 15 | 2012 | A Gulland      | Red Cross tries to negotiate a ceasefire in Syria                                                                                                    | British Medical Journal                          | 1                   |
| 16 | 2012 | D Kevat        | The growing threat to medical independence in conflict zones                                                                                         | The Lancet                                       | 1, 5                |
| 17 | 2012 | S Barmania     | Undercover medicine: treating Syria's wounded                                                                                                        | The Lancet                                       | 1                   |
| 18 | 2011 | S Arie         | Injured Syrian protestors are removed from beds as forces target hospitals                                                                           | British Medical Journal                          | 1                   |

<sup>1</sup> 1: Targeting of ambulances, 2: Double-tap attacks, 3: Delays to care and/or lack of access, 4: Obstruction and non-physical forms of violence, 5: Short and long-term consequences
